# Supplementary material for: Developing community pharmacists’ role in the management of type 2 diabetes and related microvascular complications: a nationwide survey in Australia
Source: PeerJ. 2023 Feb 16;11:e14849. doi: 10.7717/peerj.14849 (PMC9939021; doi:10.7717/peerj.14849)
Supplement: Supplemental Information 3 [file peerj-11-14849-s003.xlsx]

## Sheet: Sheet1
	QID55	Q1_1	Q1_2	Q1_3	Q1_4	Q1_5	Q1_6	Q1_7	Q1_8	Q1_9	Q1_10	Q1_11	Q1_12	Q1_13	Q1_14	Q1_15	Q1_16	Q1_17	Q1_18	Q1_19	Q1_20	Q1_21	Q1_22	Q1_23	Q1_24	Q1_25	Q2	Q3_1	Q3_2	Q3_3	Q3_4	Q3_5	Q3_6	Q3_7	Q3_8	Q3_9	Q3_10	Q3_11	Q3_12	Q3_13	Q3_14	Q3_15	Q4_1	Q4_2	Q4_3	Q4_4	Q4_5	Q4_6	Q4_7
	Participant Information Statement HREC Project Number HRE2021-0442 Project Title: Community pharmacists’ role in the management of type 2 diabetes and its microvascular complications: A nationwide survey Chief Investigator: Dr Leanne Chalmers, Senior Lecturer, Curtin Medical School Other Investigators: Dr Tin Fei Sim, Senior Lecturer; Professor Graham Hillis, Adjunct Professor; Curtin Medical Sch…	Part I: Current practice of community pharmacists in diabetes management. 1. Please answer the following statements below, regarding your practice as a pharmacist in how you currently manage type 2 diabetes (T2DM) and its associated complications in the pharmacy. Never: I do NOT provide this service to patients Rarely: I provide this service approximately 25% of the time to patients with T2DM Som…	Part I: Current practice of community pharmacists in diabetes management. 1. Please answer the following statements below, regarding your practice as a pharmacist in how you currently manage type 2 diabetes (T2DM) and its associated complications in the pharmacy. Never: I do NOT provide this service to patients Rarely: I provide this service approximately 25% of the time to patients with T2DM Som…	Part I: Current practice of community pharmacists in diabetes management. 1. Please answer the following statements below, regarding your practice as a pharmacist in how you currently manage type 2 diabetes (T2DM) and its associated complications in the pharmacy. Never: I do NOT provide this service to patients Rarely: I provide this service approximately 25% of the time to patients with T2DM Som…	Part I: Current practice of community pharmacists in diabetes management. 1. Please answer the following statements below, regarding your practice as a pharmacist in how you currently manage type 2 diabetes (T2DM) and its associated complications in the pharmacy. Never: I do NOT provide this service to patients Rarely: I provide this service approximately 25% of the time to patients with T2DM Som…	Part I: Current practice of community pharmacists in diabetes management. 1. Please answer the following statements below, regarding your practice as a pharmacist in how you currently manage type 2 diabetes (T2DM) and its associated complications in the pharmacy. Never: I do NOT provide this service to patients Rarely: I provide this service approximately 25% of the time to patients with T2DM Som…	Part I: Current practice of community pharmacists in diabetes management. 1. Please answer the following statements below, regarding your practice as a pharmacist in how you currently manage type 2 diabetes (T2DM) and its associated complications in the pharmacy. Never: I do NOT provide this service to patients Rarely: I provide this service approximately 25% of the time to patients with T2DM Som…	Part I: Current practice of community pharmacists in diabetes management. 1. Please answer the following statements below, regarding your practice as a pharmacist in how you currently manage type 2 diabetes (T2DM) and its associated complications in the pharmacy. Never: I do NOT provide this service to patients Rarely: I provide this service approximately 25% of the time to patients with T2DM Som…	Part I: Current practice of community pharmacists in diabetes management. 1. Please answer the following statements below, regarding your practice as a pharmacist in how you currently manage type 2 diabetes (T2DM) and its associated complications in the pharmacy. Never: I do NOT provide this service to patients Rarely: I provide this service approximately 25% of the time to patients with T2DM Som…	Part I: Current practice of community pharmacists in diabetes management. 1. Please answer the following statements below, regarding your practice as a pharmacist in how you currently manage type 2 diabetes (T2DM) and its associated complications in the pharmacy. Never: I do NOT provide this service to patients Rarely: I provide this service approximately 25% of the time to patients with T2DM Som…	Part I: Current practice of community pharmacists in diabetes management. 1. Please answer the following statements below, regarding your practice as a pharmacist in how you currently manage type 2 diabetes (T2DM) and its associated complications in the pharmacy. Never: I do NOT provide this service to patients Rarely: I provide this service approximately 25% of the time to patients with T2DM Som…	Part I: Current practice of community pharmacists in diabetes management. 1. Please answer the following statements below, regarding your practice as a pharmacist in how you currently manage type 2 diabetes (T2DM) and its associated complications in the pharmacy. Never: I do NOT provide this service to patients Rarely: I provide this service approximately 25% of the time to patients with T2DM Som…	Part I: Current practice of community pharmacists in diabetes management. 1. Please answer the following statements below, regarding your practice as a pharmacist in how you currently manage type 2 diabetes (T2DM) and its associated complications in the pharmacy. Never: I do NOT provide this service to patients Rarely: I provide this service approximately 25% of the time to patients with T2DM Som…	Part I: Current practice of community pharmacists in diabetes management. 1. Please answer the following statements below, regarding your practice as a pharmacist in how you currently manage type 2 diabetes (T2DM) and its associated complications in the pharmacy. Never: I do NOT provide this service to patients Rarely: I provide this service approximately 25% of the time to patients with T2DM Som…	Part I: Current practice of community pharmacists in diabetes management. 1. Please answer the following statements below, regarding your practice as a pharmacist in how you currently manage type 2 diabetes (T2DM) and its associated complications in the pharmacy. Never: I do NOT provide this service to patients Rarely: I provide this service approximately 25% of the time to patients with T2DM Som…	Part I: Current practice of community pharmacists in diabetes management. 1. Please answer the following statements below, regarding your practice as a pharmacist in how you currently manage type 2 diabetes (T2DM) and its associated complications in the pharmacy. Never: I do NOT provide this service to patients Rarely: I provide this service approximately 25% of the time to patients with T2DM Som…	Part I: Current practice of community pharmacists in diabetes management. 1. Please answer the following statements below, regarding your practice as a pharmacist in how you currently manage type 2 diabetes (T2DM) and its associated complications in the pharmacy. Never: I do NOT provide this service to patients Rarely: I provide this service approximately 25% of the time to patients with T2DM Som…	Part I: Current practice of community pharmacists in diabetes management. 1. Please answer the following statements below, regarding your practice as a pharmacist in how you currently manage type 2 diabetes (T2DM) and its associated complications in the pharmacy. Never: I do NOT provide this service to patients Rarely: I provide this service approximately 25% of the time to patients with T2DM Som…	Part I: Current practice of community pharmacists in diabetes management. 1. Please answer the following statements below, regarding your practice as a pharmacist in how you currently manage type 2 diabetes (T2DM) and its associated complications in the pharmacy. Never: I do NOT provide this service to patients Rarely: I provide this service approximately 25% of the time to patients with T2DM Som…	Part I: Current practice of community pharmacists in diabetes management. 1. Please answer the following statements below, regarding your practice as a pharmacist in how you currently manage type 2 diabetes (T2DM) and its associated complications in the pharmacy. Never: I do NOT provide this service to patients Rarely: I provide this service approximately 25% of the time to patients with T2DM Som…	Part I: Current practice of community pharmacists in diabetes management. 1. Please answer the following statements below, regarding your practice as a pharmacist in how you currently manage type 2 diabetes (T2DM) and its associated complications in the pharmacy. Never: I do NOT provide this service to patients Rarely: I provide this service approximately 25% of the time to patients with T2DM Som…	Part I: Current practice of community pharmacists in diabetes management. 1. Please answer the following statements below, regarding your practice as a pharmacist in how you currently manage type 2 diabetes (T2DM) and its associated complications in the pharmacy. Never: I do NOT provide this service to patients Rarely: I provide this service approximately 25% of the time to patients with T2DM Som…	Part I: Current practice of community pharmacists in diabetes management. 1. Please answer the following statements below, regarding your practice as a pharmacist in how you currently manage type 2 diabetes (T2DM) and its associated complications in the pharmacy. Never: I do NOT provide this service to patients Rarely: I provide this service approximately 25% of the time to patients with T2DM Som…	Part I: Current practice of community pharmacists in diabetes management. 1. Please answer the following statements below, regarding your practice as a pharmacist in how you currently manage type 2 diabetes (T2DM) and its associated complications in the pharmacy. Never: I do NOT provide this service to patients Rarely: I provide this service approximately 25% of the time to patients with T2DM Som…	Part I: Current practice of community pharmacists in diabetes management. 1. Please answer the following statements below, regarding your practice as a pharmacist in how you currently manage type 2 diabetes (T2DM) and its associated complications in the pharmacy. Never: I do NOT provide this service to patients Rarely: I provide this service approximately 25% of the time to patients with T2DM Som…	Part I: Current practice of community pharmacists in diabetes management. 1. Please answer the following statements below, regarding your practice as a pharmacist in how you currently manage type 2 diabetes (T2DM) and its associated complications in the pharmacy. Never: I do NOT provide this service to patients Rarely: I provide this service approximately 25% of the time to patients with T2DM Som…	Part I: Current practice of community pharmacists in diabetes management. 2. Do you provide any other services to your patients with T2DM that we have not covered? If so, please list them here.	Part II: Attitudes on microvascular complication management services. 3. For each of the statements below, click on the response that best characterises your opinion about the statement. - A. People with type 2 diabetes currently have adequate access to health services to manage microvascular complications (nephropathy, retinopathy and neuropathy).	Part II: Attitudes on microvascular complication management services. 3. For each of the statements below, click on the response that best characterises your opinion about the statement. - B. Community pharmacy has the potential to improve the health outcomes of people living with diabetes and microvascular complications.	Part II: Attitudes on microvascular complication management services. 3. For each of the statements below, click on the response that best characterises your opinion about the statement. - C. Monitoring microvascular complications and facilitating referrals to appropriate healthcare professionals is achievable in community pharmacy.	Part II: Attitudes on microvascular complication management services. 3. For each of the statements below, click on the response that best characterises your opinion about the statement. - D. A formal monitoring and referral service for microvascular complications is within the scope of the pharmacist.	Part II: Attitudes on microvascular complication management services. 3. For each of the statements below, click on the response that best characterises your opinion about the statement. - E. There is a need for a formal monitoring and referral service for microvascular complications in the community pharmacy.	Part II: Attitudes on microvascular complication management services. 3. For each of the statements below, click on the response that best characterises your opinion about the statement. - F. A structured monitoring and referral service in pharmacies can only be implemented if there is remuneration.	Part II: Attitudes on microvascular complication management services. 3. For each of the statements below, click on the response that best characterises your opinion about the statement. - G. If a structured monitoring and referral service was available for pharmacists and pharmacies, I would implement this service in the community pharmacy if there was NO remuneration.	Part II: Attitudes on microvascular complication management services. 3. For each of the statements below, click on the response that best characterises your opinion about the statement. - H. I would provide education on diabetic foot care if I was appropriately trained to do so.	Part II: Attitudes on microvascular complication management services. 3. For each of the statements below, click on the response that best characterises your opinion about the statement. - I. I would facilitate referrals to a podiatrist for diabetic foot care if I was provided with appropriate resources.	Part II: Attitudes on microvascular complication management services. 3. For each of the statements below, click on the response that best characterises your opinion about the statement. - J. I would provide education on eye care for people living with T2DM, if I was appropriately trained to do so.	Part II: Attitudes on microvascular complication management services. 3. For each of the statements below, click on the response that best characterises your opinion about the statement. - K. I would refer patients to an ophthalmologist/ optometrist for people living with T2DM, if provided with appropriate resources.	Part II: Attitudes on microvascular complication management services. 3. For each of the statements below, click on the response that best characterises your opinion about the statement. - L. Health professionals such as podiatrists and optometrists would appreciate a referral system from pharmacists.	Part II: Attitudes on microvascular complication management services. 3. For each of the statements below, click on the response that best characterises your opinion about the statement. - M. An in-pharmacy microvascular monitoring and referral service would need to be advertised to the relevant health professionals such as podiatrists and optometrists.	Part II: Attitudes on microvascular complication management services. 3. For each of the statements below, click on the response that best characterises your opinion about the statement. - N. An in-pharmacy microvascular monitoring and referral service should be set up with local podiatrists and optometrists.	Part II: Attitudes on microvascular complication management services. 3. For each of the statements below, click on the response that best characterises your opinion about the statement. - O. An in-pharmacy microvascular monitoring and referral service would need to be advertised to the public.	Part II: Attitudes on microvascular complication management services. 4. Please indicate to what extent you believe the following to be barriers to implementing a new microvascular complication service. - A. Lack of remuneration	Part II: Attitudes on microvascular complication management services. 4. Please indicate to what extent you believe the following to be barriers to implementing a new microvascular complication service. - B. Lack of consumer awareness of the role of pharmacists in diabetes management.	Part II: Attitudes on microvascular complication management services. 4. Please indicate to what extent you believe the following to be barriers to implementing a new microvascular complication service. - C. Lack of health professional awareness of the role of pharmacists in diabetes management.	Part II: Attitudes on microvascular complication management services. 4. Please indicate to what extent you believe the following to be barriers to implementing a new microvascular complication service. - D. Pharmacists do not have adequate knowledge on microvascular complications.	Part II: Attitudes on microvascular complication management services. 4. Please indicate to what extent you believe the following to be barriers to implementing a new microvascular complication service. - E. Lack of resources to implement the service (information for pharmacists, pharmacy software, information to give to patients, etc)	Part II: Attitudes on microvascular complication management services. 4. Please indicate to what extent you believe the following to be barriers to implementing a new microvascular complication service. - F. Inadequate pharmacy layout and workflow to facilitate service provision.	Part II: Attitudes on microvascular complication management services. 4. Please indicate to what extent you believe the following to be barriers to implementing a new microvascular complication service. - G. Competing demands and lack of pharmacist availability.
1	I consent to participate in this study.	Always	Always	Always	Often	Often	Sometimes	Sometimes	Often	Often	Often	Sometimes	Sometimes	Sometimes	Sometimes	Sometimes	Sometimes	Sometimes	Sometimes	Rarely	Rarely	Rarely	Sometimes	Rarely	Rarely	Often		Agree	Agree	Agree	Agree	Agree	Agree	Agree	Strongly agree	Strongly agree	Strongly agree	Strongly agree	Strongly agree	Strongly agree	Agree	Agree	Agree	Agree	Agree	Agree	Agree	Agree	Agree
2	I consent to participate in this study.	Always	Often	Often	Sometimes	Sometimes	Always	Always	Always	Always	Sometimes	Always	Sometimes	Sometimes	Rarely	Rarely	Rarely	Rarely	Never	Never	Sometimes	Sometimes	Sometimes	Rarely	Never	Always	Sleep Apnea service	Disagree	Strongly agree	Strongly agree	Strongly agree	Strongly agree	Strongly agree	Agree	Strongly agree	Strongly agree	Strongly agree	Strongly agree	Strongly agree	Strongly agree	Strongly agree	Strongly agree	Strongly agree	Strongly agree	Strongly agree	Agree	Strongly agree	Strongly agree	Strongly agree
3	I consent to participate in this study.	Always	Always	Always	Often	Sometimes	Often	Rarely	Always	Always	Always	Never	Sometimes	Never	Never	Never	Never	Never	Never	Rarely	Rarely	Rarely	Never	Never	Never	Sometimes		Disagree	Strongly agree	Agree	Agree	Strongly agree	Strongly agree	Strongly disagree	Strongly agree	Strongly agree	Strongly agree	Strongly agree	Strongly agree	Strongly agree	Strongly agree	Strongly agree	Strongly agree	Strongly agree	Strongly agree	Strongly agree	Strongly agree	Strongly agree	Strongly agree
4	I consent to participate in this study.	Always	Always	Always	Often	Rarely	Rarely	Rarely	Sometimes	Never	Always	Never	Never	Never	Never	Never	Never	Sometimes	Never	Never	Never	Never	Rarely	Never	Never	Rarely		Unsure	Agree	Agree	Agree	Agree	Strongly agree	Strongly disagree	Agree	Unsure	Agree	Unsure	Agree	Strongly agree	Strongly agree	Strongly agree	Strongly agree	Unsure	Unsure	Unsure	Agree	Disagree	Agree
5	I consent to participate in this study.	Always	Sometimes	Always	Always	Sometimes	Rarely	Rarely	Always	Always	Often	Always	Sometimes	Sometimes	Rarely	Sometimes	Rarely	Often	Never	Never	Sometimes	Never	Sometimes	Never	Never	Never		Agree	Agree	Unsure	Agree	Agree	Strongly agree	Unsure	Agree	Agree	Agree	Agree	Agree	Agree	Agree	Agree	Strongly agree	Agree	Strongly agree	Disagree	Agree	Disagree	Agree
6	I consent to participate in this study.	Often	Sometimes	Sometimes	Rarely	Sometimes	Always	Often	Always	Often	Sometimes	Never	Rarely	Never	Never	Rarely	Rarely	Sometimes	Sometimes	Sometimes	Rarely	Rarely	Rarely	Rarely	Rarely	Often		Unsure	Strongly agree	Agree	Agree	Agree	Strongly agree	Strongly disagree	Agree	Agree	Agree	Agree	Strongly agree	Agree	Agree	Agree	Strongly agree	Strongly agree	Agree	Unsure	Agree	Disagree	Agree
7	I consent to participate in this study.	Always	Always	Always	Sometimes	Rarely	Rarely	Sometimes	Often	Sometimes	Often	Never	Rarely	Rarely	Never	Sometimes	Rarely	Often	Never	Sometimes	Sometimes	Rarely	Sometimes	Rarely	Never	Rarely	Medscheck	Unsure	Agree	Agree	Agree	Agree	Strongly agree	Agree	Strongly agree	Strongly agree	Strongly agree	Agree	Agree	Agree	Agree	Agree	Unsure	Agree	Agree	Disagree	Agree	Agree	Agree
8	I consent to participate in this study.	Always	Always	Always	Often	Often	Always	Always	Always	Always	Always	Never	Often	Often	Often	Often	Often	Often	Never	Often	Always	Often	Always	Always	Often	Often	Education with a qualified diabetes Educator	Disagree	Agree	Agree	Agree	Agree	Agree	Agree	Agree	Strongly agree	Strongly agree	Strongly agree	Strongly agree	Agree	Agree	Disagree	Agree	Disagree	Agree	Agree	Agree	Disagree	Agree
9	I consent to participate in this study.	Always	Always	Always	Always	Always	Sometimes	Sometimes	Always	Sometimes	Always	Never	Always	Always	Always	Always	Always	Always	Never	Sometimes	Always	Sometimes	Often	Often	Sometimes	Often		Agree	Strongly agree	Strongly agree	Strongly agree	Strongly agree	Unsure	Strongly agree	Strongly agree	Strongly agree	Strongly agree	Strongly agree	Strongly agree	Strongly agree	Strongly agree	Strongly agree	Strongly agree	Strongly agree	Strongly agree	Strongly disagree	Strongly agree	Disagree	Agree
10	I consent to participate in this study.	Often	Often	Often	Often	Often	Often	Sometimes	Often	Rarely	Often	Never	Often	Often	Often	Often	Often	Often	Often	Often	Often	Rarely	Rarely	Often	Sometimes	Rarely		Disagree	Strongly agree	Disagree	Strongly agree	Strongly agree	Agree	Agree	Agree	Agree	Agree	Strongly agree	Strongly agree	Agree	Agree	Agree	Strongly agree	Agree	Agree	Disagree	Disagree	Disagree	Agree
11	I consent to participate in this study.	Always	Often	Always	Never	Rarely	Never	Never	Sometimes	Rarely	Sometimes	Never	Never	Never	Never	Never	Never	Never	Never	Never	Never	Never	Never	Never	Never	Never		Disagree	Strongly disagree	Strongly disagree	Strongly disagree	Strongly disagree	Disagree	Disagree	Strongly disagree	Strongly disagree	Strongly disagree	Strongly disagree	Unsure	Unsure	Agree	Agree	Agree	Agree	Agree	Agree	Agree	Agree	Agree
12	I consent to participate in this study.	Often	Rarely	Rarely	Sometimes	Often	Often	Sometimes	Often	Rarely	Sometimes	Never	Rarely	Never	Never	Rarely	Rarely	Never	Rarely	Sometimes	Often	Sometimes	Rarely	Rarely	Rarely	Never	Diabetes medschecks. Prescriptions	Unsure	Agree	Disagree	Unsure	Disagree	Agree	Disagree	Agree	Agree	Agree	Agree	Agree	Strongly agree	Agree	Agree	Strongly agree	Agree	Agree	Unsure	Agree	Agree	Agree
13	I consent to participate in this study.	Sometimes	Always	Always	Often	Always	Often	Sometimes	Often	Always	Often	Often	Rarely	Never	Never	Sometimes	Sometimes	Often	Never	Never	Sometimes	Rarely	Rarely	Never	Never	Never		Unsure	Agree	Agree	Agree	Disagree	Agree	Unsure	Agree	Agree	Agree	Agree	Agree	Agree	Agree	Agree	Strongly agree	Strongly agree	Agree	Strongly agree	Strongly agree	Agree	Agree
14	I consent to participate in this study.	Sometimes	Often	Often	Sometimes	Often	Sometimes	Rarely	Always	Sometimes	Sometimes	Never	Rarely	Never	Never	Rarely	Never	Never	Never	Never	Never	Never	Rarely	Never	Never	Never	Diabetes Medschecks	Unsure	Unsure	Agree	Agree	Strongly agree	Agree	Unsure	Agree	Agree	Agree	Agree	Strongly agree	Agree	Agree	Agree	Strongly agree	Agree	Agree	Disagree	Agree	Disagree	Agree
15	I consent to participate in this study.	Always	Often	Always	Often	Often	Sometimes	Sometimes	Always	Always	Often	Never	Never	Never	Never	Never	Never	Never	Never	Never	Rarely	Sometimes	Never	Never	Never	Rarely	No	Disagree	Strongly agree	Strongly agree	Strongly agree	Strongly agree	Strongly agree	Disagree	Agree	Agree	Agree	Agree	Strongly agree	Agree	Agree	Agree	Strongly agree	Strongly agree	Strongly agree	Agree	Agree	Agree	Strongly agree
16		Often	Always	Often	Often	Often	Often	Often	Often	Sometimes	Often	Never	Often	Often	Sometimes	Often	Often	Sometimes	Never	Sometimes	Often	Sometimes	Sometimes	Sometimes	Rarely	Often
17	I consent to participate in this study.	Always	Sometimes	Sometimes	Often	Sometimes	Always	Always	Always	Always	Sometimes	Never	Never	Never	Never	Never	Never	Never	Never	Never	Never	Never	Rarely	Rarely	Rarely	Rarely	no.	Strongly disagree	Agree	Agree	Strongly agree	Strongly agree	Strongly agree	Unsure	Agree	Strongly agree	Strongly agree	Strongly agree	Strongly agree	Strongly agree	Strongly agree	Agree	Strongly agree	Strongly agree	Strongly agree	Strongly agree	Strongly agree	Strongly agree	Strongly agree
18	I consent to participate in this study.	Often	Never	Sometimes	Rarely	Sometimes	Never	Never	Always	Never	Rarely	Never	Never	Never	Never	Never	Never	Rarely	Never	Rarely	Never	Never	Sometimes	Rarely	Never	Never
19	I consent to participate in this study.	Always	Always	Always	Often	Sometimes	Sometimes	Sometimes	Often	Rarely	Often	Never	Sometimes	Sometimes	Rarely	Sometimes	Sometimes	Sometimes	Sometimes	Rarely	Sometimes	Rarely	Rarely	Rarely	Rarely	Rarely		Agree	Strongly agree	Agree	Agree	Agree	Strongly agree	Agree	Agree	Agree	Agree	Agree	Strongly agree	Agree	Agree	Agree	Agree	Unsure	Agree	Agree	Agree	Agree	Agree
20	I consent to participate in this study.	Always	Often	Often	Often	Sometimes	Never	Never	Always	Often	Sometimes	Never	Sometimes	Rarely	Never	Rarely	Rarely	Rarely	Rarely	Rarely	Rarely	Rarely	Sometimes	Rarely	Never	Never
21	I consent to participate in this study.	Often	Always	Always	Always	Always	Always	Always	Often	Often	Often	Often	Often	Often	Often	Always	Always	Always	Often	Often	Often	Sometimes	Often		Often	Often		Agree	Agree	Agree	Agree	Agree	Agree	Agree	Agree	Agree	Agree	Agree	Agree	Agree	Agree	Agree	Agree	Agree	Agree		Agree	Agree	Agree
22	I consent to participate in this study.	Always	Always	Always	Always	Always	Always	Always	Always	Always	Always	Never	Always	Always	Always	Always	Always	Always	Always	Always	Always	Always	Always	Always	Always	Always	Diabetes education and cde service	Disagree	Strongly agree	Strongly agree	Agree	Strongly agree	Unsure	Agree	Strongly agree	Strongly agree	Strongly agree	Strongly agree	Strongly agree	Disagree	Unsure	Unsure	Strongly agree	Unsure	Unsure	Agree	Strongly agree	Unsure	Unsure
23	I consent to participate in this study.	Often	Often	Often	Sometimes	Often	Sometimes	Rarely	Often	Rarely	Sometimes	Never	Sometimes	Sometimes	Rarely	Rarely	Rarely	Never	Sometimes	Rarely	Sometimes	Rarely	Sometimes	Rarely	Rarely	Sometimes		Disagree	Agree	Agree	Agree	Strongly agree	Agree	Unsure	Agree	Agree	Agree	Agree	Agree	Agree	Agree	Agree	Agree	Disagree	Agree	Disagree	Agree	Agree	Strongly agree
24	I consent to participate in this study.	Often	Sometimes	Sometimes	Often	Sometimes	Rarely	Rarely	Sometimes	Often	Often	Never	Rarely	Never	Never	Never	Never	Sometimes	Never	Rarely	Sometimes	Sometimes	Never	Never	Never	Sometimes	Diet managed diabetic support in pharmacy	Disagree	Strongly agree	Strongly agree	Strongly agree	Strongly agree	Strongly agree	Agree	Strongly agree	Strongly agree	Strongly agree	Strongly agree	Strongly agree	Strongly agree	Strongly agree	Strongly agree	Agree	Agree	Agree	Unsure	Agree	Agree	Agree
25	I consent to participate in this study.	Often	Sometimes	Rarely	Sometimes	Sometimes	Never	Never	Often	Never	Rarely	Never	Rarely	Never	Never	Never	Never	Rarely	Never	Never	Rarely	Rarely	Never	Never	Never	Sometimes	Supply consumables used in blood glucose monitoring, educate people on how to use their blood glucose machines	Agree	Agree	Strongly agree	Agree	Agree	Agree	Agree	Agree	Agree	Agree	Agree	Agree	Agree	Agree	Agree	Unsure	Agree	Agree	Agree	Agree	Unsure	Agree
26	I consent to participate in this study.	Always	Often	Always	Always	Often	Sometimes	Rarely	Sometimes	Sometimes	Often	Never	Sometimes	Sometimes	Rarely	Rarely	Sometimes	Sometimes	Never	Rarely	Sometimes	Rarely	Rarely	Rarely	Never	Rarely		Unsure	Agree	Agree	Agree	Agree	Unsure	Agree	Agree	Agree	Agree	Agree	Agree	Agree	Unsure	Agree	Agree	Agree	Agree	Agree	Agree	Agree	Agree
27	I consent to participate in this study.	Always	Sometimes	Sometimes	Sometimes	Sometimes	Always	Always	Always	Always	Sometimes	Never	Never	Never	Never	Never	Never	Never	Never	Never	Never	Never	Never	Never	Never	Never		Unsure	Agree	Strongly agree	Agree	Strongly agree	Strongly agree	Strongly disagree	Strongly agree	Strongly agree	Strongly agree	Strongly agree	Unsure	Agree	Strongly agree	Agree	Strongly agree	Strongly agree	Strongly agree	Strongly agree	Strongly agree	Unsure	Strongly agree
28	I consent to participate in this study.	Always	Always	Always	Always	Always	Sometimes	Always		Always	Always		Always	Always	Always	Sometimes		Sometimes		Sometimes		Sometimes		Sometimes		Sometimes		Strongly agree	Strongly disagree	Strongly agree	Agree	Agree	Strongly disagree	Strongly agree		Strongly agree		Strongly agree		Strongly agree		Strongly agree	Strongly agree		Strongly disagree	Disagree		Agree
29	I consent to participate in this study.	Never	Never	Sometimes	Sometimes	Never	Never	Never	Sometimes	Sometimes	Sometimes	Never	Sometimes	Sometimes	Rarely	Sometimes	Sometimes	Rarely	Never	Never	Sometimes	Never	Never	Never	Never	Rarely		Disagree	Unsure	Disagree	Unsure	Disagree	Strongly agree	Strongly disagree	Disagree	Unsure	Disagree	Unsure	Unsure	Unsure	Unsure	Agree	Strongly agree	Unsure	Agree	Agree	Strongly agree	Strongly agree	Strongly agree
30	I consent to participate in this study.	Always	Rarely	Always	Always	Always	Always	Always	Sometimes	Often	Always	Always	Always	Always	Rarely	Always		Always	Always	Always	Sometimes	Always	Sometimes	Always	Always	Always		Unsure	Strongly agree	Strongly agree				Strongly agree	Strongly agree	Strongly agree			Strongly agree	Strongly agree			Strongly agree			Strongly agree
31	I consent to participate in this study.	Rarely	Rarely	Sometimes	Never	Rarely	Never	Never	Rarely	Sometimes	Rarely	Never	Never	Never	Never	Never	Never	Never	Never	Never	Never	Never	Never	Never	Never	Never		Strongly disagree	Strongly disagree	Strongly disagree	Agree	Agree	Agree	Strongly disagree	Strongly disagree	Unsure	Unsure	Agree	Agree	Agree	Agree	Agree	Agree	Agree	Unsure	Agree	Agree	Agree	Agree
32	I consent to participate in this study.	Always	Always	Often	Often	Sometimes	Never	Sometimes	Always	Always	Often	Never	Rarely	Rarely	Rarely	Rarely	Rarely	Sometimes	Never	Never	Sometimes	Rarely	Rarely	Never	Never	Never		Unsure	Agree	Agree	Agree	Agree	Strongly agree	Unsure	Agree	Agree	Agree	Agree	Unsure	Unsure	Agree	Agree	Strongly agree	Agree	Strongly agree	Agree	Agree	Disagree	Strongly agree
33	I consent to participate in this study.	Always	Sometimes	Often	Often	Sometimes	Rarely	Often	Always	Always	Always	Never	Often	Sometimes	Rarely	Often	Sometimes	Often	Rarely	Rarely	Often	Never	Rarely	Rarely	Never	Often		Agree	Agree	Disagree	Disagree	Agree	Strongly agree	Unsure	Strongly agree	Disagree	Agree	Disagree	Unsure	Agree	Agree	Agree	Strongly agree	Agree	Agree	Unsure	Agree	Agree	Strongly agree
34	I consent to participate in this study.	Always	Often	Often	Rarely	Sometimes	Rarely	Rarely	Sometimes	Sometimes	Often	Never	Rarely	Never	Never	Never	Never	Rarely	Never	Never	Rarely	Never	Never	Never	Never	Never	Diabetes medscheck, DAAs	Disagree	Agree	Agree	Agree	Unsure	Unsure	Unsure	Agree	Agree	Agree	Agree	Unsure	Agree	Agree	Agree	Agree	Agree	Agree	Unsure	Agree	Agree	Strongly agree
35	I consent to participate in this study.	Always	Sometimes	Often	Sometimes	Sometimes	Rarely	Rarely	Often	Often	Sometimes	Never	Rarely	Rarely	Rarely	Often	Sometimes	Sometimes	Never	Never	Sometimes	Never	Sometimes	Never	Rarely	Never		Agree	Strongly agree	Strongly agree	Strongly agree	Agree	Agree	Agree	Agree	Strongly agree	Agree	Strongly agree	Unsure	Agree	Agree	Agree	Agree	Agree	Strongly agree	Disagree	Unsure	Disagree	Disagree
36	I consent to participate in this study.	Always	Always	Always	Sometimes	Often	Rarely	Rarely	Always	Sometimes	Often	Never	Sometimes	Sometimes	Never	Often	Sometimes	Often	Never	Sometimes	Always	Sometimes	Sometimes	Rarely	Rarely	Rarely		Disagree	Agree	Agree	Agree	Agree	Agree	Strongly disagree	Agree	Agree	Agree	Agree	Agree	Agree	Agree	Agree	Strongly agree	Strongly agree	Agree	Agree	Strongly agree	Strongly agree	Strongly agree
37	I consent to participate in this study.	Often	Often	Often	Often	Often	Sometimes	Sometimes	Always	Sometimes	Always	Never	Sometimes	Sometimes	Sometimes	Sometimes	Sometimes	Sometimes	Never	Sometimes	Sometimes	Sometimes	Sometimes	Sometimes	Sometimes	Rarely		Strongly disagree	Strongly agree	Agree	Agree	Agree	Strongly agree	Strongly disagree	Agree	Agree	Agree	Agree	Agree	Agree	Agree	Agree	Strongly agree	Strongly agree	Agree	Strongly agree	Strongly agree	Strongly agree	Strongly agree
38	I consent to participate in this study.	Always	Always	Always	Often	Rarely	Rarely	Often	Always	Always	Often	Never	Often	Sometimes	Rarely	Sometimes	Sometimes	Sometimes	Never	Never	Sometimes	Never	Never	Never	Never	Never		Unsure	Strongly agree	Strongly agree	Agree	Agree	Strongly agree	Agree	Strongly agree	Strongly agree	Strongly agree	Strongly agree	Strongly agree	Strongly agree	Strongly agree	Strongly agree	Strongly agree	Strongly agree	Strongly agree	Agree	Strongly agree	Strongly agree	Strongly agree
39	I consent to participate in this study.	Often	Always	Always	Sometimes	Often	Rarely	Sometimes	Often	Often	Always	Never	Rarely	Sometimes	Sometimes	Sometimes	Sometimes	Often	Sometimes	Rarely	Sometimes	Rarely	Sometimes	Rarely	Sometimes	Sometimes	N/A	Agree	Strongly agree	Strongly agree	Strongly agree	Strongly agree	Agree	Unsure	Strongly agree	Strongly agree	Strongly agree	Strongly agree	Strongly agree	Agree	Agree	Agree	Agree	Agree	Agree	Disagree	Agree	Disagree	Disagree
40	I consent to participate in this study.	Often	Rarely	Sometimes	Sometimes	Sometimes	Sometimes	Rarely	Often	Sometimes	Rarely	Rarely	Never	Never	Never	Never	Never	Never	Never	Never	Never	Rarely	Rarely	Never	Never	Never	N/A	Agree	Strongly agree	Strongly agree	Agree	Agree	Agree	Agree	Strongly agree	Strongly disagree	Strongly disagree	Strongly agree	Strongly agree	Agree	Agree	Agree	Agree	Strongly agree	Agree	Disagree	Agree	Disagree	Agree
41	I consent to participate in this study.	Always	Always	Always	Sometimes	Rarely	Rarely	Rarely	Always	Often	Often	Never	Sometimes	Sometimes	Never	Sometimes	Sometimes	Never	Never	Rarely	Rarely	Rarely	Rarely	Rarely	Rarely	Rarely		Unsure	Agree	Agree	Agree	Agree	Strongly agree	Unsure	Agree	Agree	Agree	Agree	Unsure	Agree	Agree	Agree	Strongly agree	Strongly agree	Strongly agree	Unsure	Agree	Agree	Strongly agree
42	I consent to participate in this study.	Always	Rarely	Rarely	Rarely	Rarely	Rarely	Never	Sometimes	Never	Rarely	Never	Never	Never	Never	Never	Never	Never	Never	Never	Never	Never	Never	Never	Never	Never
43	I consent to participate in this study.	Always	Always	Always	Often	Always	Always	Often	Sometimes	Never	Always	Never	Always	Always	Always	Always	Always	Always	Never	Always	Always	Rarely	Rarely	Rarely	Often	Rarely
44	I consent to participate in this study.	Often	Sometimes	Rarely	Sometimes	Sometimes	Never	Rarely	Always	Often	Often	Never	Sometimes	Never	Never	Rarely	Rarely	Rarely	Never	Sometimes	Sometimes	Sometimes	Sometimes	Never	Never	Never	Nil	Unsure	Agree	Agree	Agree	Agree	Agree	Agree	Agree	Agree	Agree	Agree	Agree	Agree	Agree	Strongly agree	Strongly agree	Agree	Agree	Agree	Agree	Strongly agree	Strongly agree
45	I consent to participate in this study.	Always	Rarely	Sometimes	Rarely	Often	Sometimes	Never	Sometimes	Often	Often	Never	Often	Rarely	Sometimes	Often	Sometimes	Never	Never	Often	Often	Sometimes	Often	Sometimes	Often	Never	No	Disagree	Agree	Agree	Agree	Agree	Agree	Agree	Agree	Agree	Agree	Agree	Agree	Agree	Strongly agree	Agree	Agree	Strongly agree	Strongly agree	Strongly agree	Agree	Unsure	Agree
46	I consent to participate in this study.	Often	Often	Sometimes	Sometimes	Often	Often	Sometimes	Often	Sometimes	Rarely	Never	Never	Rarely	Never	Never	Never	Rarely	Never	Never	Rarely	Never	Sometimes	Rarely	Rarely	Sometimes
47	I consent to participate in this study.	Often	Often	Sometimes	Often	Sometimes	Sometimes	Sometimes	Often	Sometimes	Often	Never	Rarely	Rarely	Rarely	Rarely	Rarely	Rarely	Sometimes	Never	Never	Never	Never	Never	Never	Sometimes
48	I consent to participate in this study.	Often	Sometimes	Sometimes	Rarely	Sometimes	Never	Sometimes	Often	Rarely	Often	Never	Rarely	Rarely	Never	Rarely	Rarely	Never	Never	Never	Sometimes	Never	Never	Never	Never	Never		Unsure	Strongly agree	Agree	Unsure	Agree	Strongly agree	Disagree	Agree	Agree	Strongly agree	Strongly agree	Unsure	Strongly agree	Agree	Strongly agree	Strongly agree	Strongly agree	Strongly agree	Unsure	Strongly agree	Agree	Strongly agree
49	I consent to participate in this study.	Always	Always	Often	Often	Sometimes	Never	Sometimes	Always	Always	Always	Never	Often	Sometimes	Sometimes	Often	Often	Often	Never	Sometimes	Often	Sometimes	Often	Sometimes	Sometimes	Sometimes
50	I consent to participate in this study.	Always	Sometimes	Sometimes	Sometimes	Often	Rarely	Sometimes	Always	Always	Sometimes	Never	Rarely	Rarely	Never	Never	Never	Never	Never	Rarely	Rarely	Rarely	Rarely	Rarely	Rarely	Never
51	I consent to participate in this study.	Always	Always	Always	Sometimes	Often	Sometimes	Rarely	Always	Always	Often	Never	Rarely	Rarely	Never	Sometimes	Always	Never	Never	Rarely	Sometimes	Never	Never	Never	Rarely	Rarely
52	I consent to participate in this study.	Always	Always	Always	Often	Sometimes	Sometimes	Sometimes	Sometimes	Rarely	Sometimes	Never	Often	Often	Often	Often	Often	Often	Often	Often	Often	Rarely	Rarely	Rarely	Rarely	Rarely		Unsure	Strongly agree	Agree	Unsure	Agree	Agree	Agree	Agree	Agree	Agree	Agree	Agree	Agree	Agree	Agree	Agree	Agree	Agree	Disagree	Agree	Agree	Agree
53	I consent to participate in this study.	Always	Always	Often	Often	Sometimes	Often	Often	Often	Often	Often	Never	Sometimes	Rarely	Rarely	Sometimes	Sometimes	Sometimes	Never	Rarely	Sometimes	Sometimes	Rarely	Rarely	Rarely	Sometimes		Agree	Strongly agree	Agree	Agree	Agree	Agree	Agree	Strongly agree	Agree	Strongly agree	Strongly agree	Strongly agree	Strongly agree	Agree	Strongly agree	Strongly agree	Agree	Agree	Agree	Agree	Disagree	Agree
54	I consent to participate in this study.	Always	Sometimes	Sometimes	Often	Sometimes	Sometimes	Never	Sometimes	Sometimes	Often	Rarely	Rarely	Rarely	Rarely	Sometimes	Sometimes	Often	Never	Rarely	Sometimes	Rarely	Often	Sometimes	Rarely	Sometimes		Agree	Strongly agree	Strongly agree	Strongly agree	Strongly agree	Agree	Agree	Strongly agree	Strongly agree	Strongly agree	Strongly agree	Strongly agree	Strongly agree	Strongly agree	Agree	Agree	Strongly agree	Strongly agree	Disagree	Unsure	Strongly disagree	Strongly disagree
55	I consent to participate in this study.	Often	Sometimes	Often	Often	Sometimes	Sometimes	Sometimes	Often	Rarely	Sometimes	Never	Often	Often	Often	Often	Often	Sometimes	Never	Often	Often	Often	Rarely	Rarely	Rarely	Rarely		Unsure	Agree	Unsure	Unsure	Agree	Disagree	Agree	Agree	Agree	Agree	Agree	Strongly agree	Agree	Agree	Agree	Unsure	Unsure	Unsure	Disagree	Agree	Agree	Agree
56	I consent to participate in this study.	Sometimes	Sometimes	Sometimes	Sometimes	Sometimes	Sometimes	Sometimes	Sometimes	Never	Sometimes	Never	Sometimes	Sometimes	Rarely	Sometimes	Sometimes	Sometimes	Sometimes	Sometimes	Often	Sometimes	Sometimes	Sometimes	Sometimes	Sometimes		Unsure	Agree	Agree	Agree	Agree	Agree	Agree	Agree	Strongly agree	Strongly agree	Strongly agree	Agree	Agree	Agree	Agree	Agree	Agree	Agree	Agree	Agree	Agree	Strongly agree
57	I consent to participate in this study.	Always	Always	Always	Often	Sometimes	Sometimes	Sometimes	Sometimes	Often	Often	Sometimes	Often	Often	Sometimes	Sometimes	Sometimes	Sometimes	Rarely	Sometimes	Sometimes	Sometimes	Sometimes	Sometimes	Sometimes	Sometimes	No	Disagree	Agree	Agree	Agree	Unsure	Strongly agree	Disagree	Unsure	Agree	Agree	Agree	Agree	Agree	Agree	Agree	Agree	Agree	Agree	Agree	Agree	Agree	Agree
58	I consent to participate in this study.	Always	Often	Often	Rarely	Rarely	Rarely	Never	Often	Sometimes	Rarely	Never	Rarely	Rarely	Rarely	Rarely	Rarely	Sometimes	Rarely	Rarely	Sometimes	Rarely	Rarely	Never	Sometimes	Often	Annual health checks	Agree	Agree	Agree	Agree	Agree	Unsure	Agree	Agree	Agree	Agree	Agree	Agree	Agree	Agree	Agree	Agree	Disagree	Agree	Unsure	Disagree	Disagree	Agree
59	I consent to participate in this study.	Always	Always	Always	Sometimes	Sometimes	Rarely	Rarely	Always	Often	Often	Never	Sometimes	Rarely	Rarely	Sometimes	Rarely	Sometimes	Rarely	Always	Often	Always	Often	Rarely	Rarely	Rarely		Agree	Strongly agree	Unsure	Strongly agree	Unsure	Agree	Unsure	Agree	Agree	Agree	Agree	Strongly agree	Strongly agree	Unsure	Strongly agree	Unsure	Strongly agree	Disagree	Disagree	Unsure	Strongly agree	Strongly agree
60	I consent to participate in this study.	Always	Often	Always	Always	Always	Often	Rarely	Sometimes	Always	Always	Sometimes	Often	Sometimes	Rarely	Often	Often	Always	Sometimes	Often	Often	Rarely	Sometimes	Rarely	Often	Rarely	Basic help with insulin start	Strongly disagree	Strongly agree	Agree	Strongly disagree	Strongly agree	Strongly agree	Unsure	Strongly agree	Strongly agree	Strongly agree	Strongly agree	Strongly agree	Strongly agree	Strongly agree	Unsure	Agree	Agree	Agree	Strongly agree	Strongly agree	Agree	Strongly agree
61	I consent to participate in this study.	Always	Always	Always	Sometimes	Sometimes	Often	Often	Sometimes	Sometimes	Often	Sometimes	Often	Rarely	Never	Rarely	Never	Never	Never	Never	Rarely	Never	Sometimes	Never	Never	Rarely		Disagree	Strongly agree	Strongly agree	Agree	Strongly agree	Strongly agree	Agree	Strongly agree	Strongly agree	Strongly agree	Strongly agree	Agree	Agree	Agree	Agree	Strongly agree	Agree	Strongly agree	Agree	Agree	Agree	Strongly agree
62	I consent to participate in this study.	Always	Sometimes	Always	Sometimes	Sometimes	Sometimes	Sometimes	Sometimes	Rarely	Sometimes	Rarely	Sometimes	Sometimes	Sometimes	Sometimes	Sometimes	Sometimes	Rarely	Sometimes	Sometimes	Sometimes	Sometimes	Sometimes	Sometimes	Rarely		Agree	Strongly agree	Strongly agree	Agree	Disagree	Unsure	Disagree	Agree	Agree	Agree	Agree	Agree	Agree	Agree	Agree	Agree	Unsure	Disagree	Strongly disagree	Unsure	Unsure	Agree
63	I consent to participate in this study.	Sometimes	Rarely	Rarely	Sometimes	Rarely	Sometimes	Sometimes	Often	Never	Rarely	Never	Rarely	Never	Never	Never	Never	Never	Never	Rarely	Rarely	Never	Never	Rarely	Never	Rarely
64	I consent to participate in this study.	Always	Always	Always	Always	Often	Often	Often	Always	Always	Always	Never	Often	Often	Often	Often	Often	Often	Never	Often	Often	Sometimes	Often	Rarely	Rarely	Sometimes	n/a	Unsure	Strongly agree	Strongly agree	Strongly agree	Strongly agree	Agree	Agree	Agree	Agree	Strongly agree	Strongly agree	Strongly agree	Strongly agree	Strongly agree	Strongly agree	Agree	Agree	Agree	Agree	Agree	Agree	Agree
65	I consent to participate in this study.	Often	Sometimes	Sometimes	Sometimes	Always	Sometimes	Sometimes	Always	Sometimes	Sometimes	Never	Rarely	Rarely	Rarely	Rarely	Rarely	Rarely	Rarely	Rarely	Rarely	Rarely	Rarely	Rarely	Rarely	Rarely	N/A	Disagree	Strongly agree	Agree	Agree	Agree	Agree	Agree	Agree	Agree	Agree	Agree	Agree	Agree	Agree	Agree	Agree	Agree	Agree	Strongly agree	Agree	Agree	Agree
66	I consent to participate in this study.	Rarely	Always	Always	Often	Sometimes	Rarely	Rarely	Often	Often	Sometimes	Rarely	Rarely	Rarely	Rarely	Rarely	Rarely	Often	Never	Sometimes	Sometimes	Rarely	Often	Sometimes	Rarely	Never		Disagree	Agree	Unsure	Agree	Agree	Agree	Disagree	Agree	Agree	Agree	Agree	Agree	Agree	Agree	Agree	Strongly agree	Strongly agree	Strongly agree	Disagree	Strongly agree	Strongly agree	Strongly agree
67	I consent to participate in this study.	Always	Always	Often	Often	Sometimes	Rarely	Rarely	Always	Always	Often	Never	Rarely	Rarely	Rarely	Sometimes	Rarely	Sometimes	Never	Rarely	Always	Rarely	Rarely	Never	Never	Never	No	Unsure	Agree	Agree	Agree	Unsure	Strongly agree	Disagree	Strongly agree	Strongly agree	Strongly agree	Strongly agree	Unsure	Agree	Agree	Disagree	Strongly agree	Strongly agree	Strongly agree	Disagree	Agree	Agree	Agree
68	I consent to participate in this study.	Always	Sometimes	Always	Often	Often	Rarely	Always	Always	Never	Sometimes	Never	Sometimes	Sometimes	Rarely	Sometimes	Rarely	Often	Rarely	Sometimes	Sometimes	Rarely	Sometimes	Sometimes	Rarely	Rarely		Unsure	Strongly agree	Strongly agree	Strongly agree	Agree	Strongly agree	Disagree	Strongly agree	Strongly agree	Strongly agree	Strongly agree	Strongly agree	Agree	Agree	Agree	Strongly agree	Agree	Unsure	Strongly disagree	Unsure	Disagree	Agree
69	I consent to participate in this study.	Always	Always	Always	Often	Often	Sometimes	Sometimes	Often	Often	Often	Never	Sometimes	Sometimes	Never	Often	Often	Often	Never	Sometimes	Often	Often	Sometimes	Sometimes	Often	Sometimes	Medschecks and Medication Reviews	Disagree	Strongly agree	Strongly agree	Agree	Strongly agree	Strongly agree	Strongly disagree	Strongly agree	Strongly agree	Strongly agree	Strongly agree	Strongly agree	Strongly agree	Strongly agree	Strongly agree	Strongly agree	Strongly agree	Strongly agree	Strongly disagree	Agree	Agree	Agree
70	I consent to participate in this study.	Often	Often	Often	Sometimes	Sometimes	Never	Never	Sometimes	Never	Sometimes	Never	Rarely	Rarely	Rarely	Rarely	Rarely	Sometimes	Never	Never	Never	Never	Rarely	Never	Never	Never	No																Unsure	Agree	Agree	Agree	Agree	Agree	Agree
71	I consent to participate in this study.	Always	Always	Always	Sometimes	Often	Sometimes	Sometimes	Always	Never	Always	Never	Sometimes	Sometimes	Sometimes	Sometimes	Sometimes	Sometimes	Rarely	Never	Sometimes	Never	Rarely	Rarely	Sometimes	Never		Agree	Strongly agree	Unsure	Unsure	Agree	Agree	Unsure	Strongly agree	Strongly agree	Strongly agree	Strongly agree	Agree	Agree	Strongly agree	Agree	Strongly agree	Agree	Unsure	Agree	Agree	Strongly agree	Strongly agree
72	I consent to participate in this study.	Always	Often	Often	Sometimes	Often	Rarely	Never	Always	Never	Often	Never	Rarely	Rarely	Never	Rarely	Never	Sometimes	Never	Never	Never	Never	Rarely	Never	Never	Rarely		Unsure	Agree	Agree	Unsure	Unsure
73	I consent to participate in this study.	Always	Sometimes	Often	Often	Sometimes	Always	Always	Always	Always	Sometimes	Never	Never	Never	Never	Rarely	Never	Never	Never	Never	Rarely	Never	Never	Never	Never	Never		Disagree	Unsure	Agree	Strongly agree	Strongly agree	Strongly agree	Strongly disagree	Agree	Agree	Agree	Agree	Unsure	Unsure	Agree	Unsure	Strongly agree	Strongly agree	Strongly agree	Strongly agree	Strongly agree	Strongly agree	Strongly agree
74	I consent to participate in this study.	Always	Often	Often	Often	Often	Always	Always	Always																			Unsure	Strongly agree	Agree	Agree	Strongly agree	Strongly agree	Unsure									Strongly agree	Agree	Agree	Disagree	Agree	Unsure	Disagree
75	I consent to participate in this study.	Always	Rarely	Rarely	Often	Rarely	Rarely	Sometimes	Sometimes																			Agree	Strongly agree	Unsure	Agree	Agree	Agree	Disagree									Agree	Agree	Disagree	Disagree	Strongly agree	Disagree	Strongly agree
76	I consent to participate in this study.	Always	Often	Rarely		Sometimes	Often		Never
77	I consent to participate in this study.	Always	Sometimes	Often	Often	Sometimes	Always	Always	Always	Always	Sometimes	Never	Never	Never	Never	Rarely	Never	Never	Never	Never	Rarely	Never	Never	Never	Never	Never		Disagree	Unsure	Agree	Strongly agree	Strongly agree	Strongly agree	Strongly disagree	Agree	Agree	Agree	Agree	Unsure	Unsure	Agree	Unsure	Strongly agree	Strongly agree	Strongly agree	Strongly agree	Strongly agree	Strongly agree	Strongly agree
[truncated: 42 more columns]
