# Supplementary material for: Developing community pharmacists’ role in the management of type 2 diabetes and related microvascular complications: a nationwide survey in Australia
Source: PeerJ journal article supplement (doi:10.7717/peerj.14849), 2023-02-16
Supplement: Supplementary_Material_1_Survey.pdf [file Supplementary_Material_1_Survey.pdf]

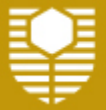

## Participant Information and Consent

### Participant Information Statement

|                      |                                                                                                                           |
|----------------------|---------------------------------------------------------------------------------------------------------------------------|
| HREC Project Number  | 74225                                                                                                                     |
| Project Title:       | Community pharmacists' role in the management of type 2 diabetes and its microvascular complications: A nationwide survey |
| Chief Investigator:  | Dr Leanne Chalmers, Senior Lecturer, Curtin Medical School                                                                |
| Other Investigators: | Dr Tin Fei Sim, Senior Lecturer; Professor Graham Hillis, Adjunct Professor; Curtin Medical School                        |
|                      |                                                                                                                           |

|                     |                 |
|---------------------|-----------------|
| Student researcher: | Louise Woodhams |
| Version Number:     | 2               |
| Version Date:       | 18/03/2021      |

### **What is this study about?**

This study aims to investigate the current role of pharmacists in type 2 diabetes management and in the management and monitoring of microvascular complications in the primary care community setting. Microvascular complications include diabetic nephropathy, retinopathy and neuropathy. The current practice of pharmacists will be examined, as well as the need for further education in monitoring and referrals for microvascular complications associated with type 2 diabetes. This questionnaire will also assess the readiness of pharmacists in implementing this service and the current barriers faced by pharmacists. The objectives of this questionnaire include:

1. Investigate the current practice of community pharmacists in diabetes management,

2. Investigate the barriers in implementing a microvascular complication management service in a community pharmacy setting,
3. Explore community pharmacists' attitudes and perspectives on the implementation of microvascular complication management services,
4. Identify the need for continued professional development and the development of future training, and
5. Explore potential service delivery models.

### **Who is doing the study?**

This project will be conducted by Louise Woodhams from the Curtin Medical School at Curtin University as part of a Doctor of Philosophy (Pharmacy) degree. This project is under the supervision of Dr Leanne Chalmers, Dr Tin Fei Sim and Adjunct Professor Graham Hillis from Curtin Medical School, Curtin University.

### **What does participation in the research entail?**

Participation in this study involves completing a questionnaire on the current roles of pharmacists in diabetes management and the readiness of pharmacists to implement microvascular complications monitoring and referral services. While it is not mandatory to complete every question, responses that are detailed and comprehensive will strengthen the results and help to positively impact the profession in the future. There will be a

section at the end for further comments. The questionnaire should take no longer than X minutes to complete.

**Are there any benefits to participating in the study?**

By participating in this questionnaire, participants will be invited to enter a prize draw. Other benefits include potential expansion of scope of practice in diabetes management.

**Are there any risk, side effects, discomforts or inconveniences from being involved in the study?**

Whilst all efforts have been made to ensure the identity of participants remains anonymous, there is a possibility that participants may be identified from responses in the questionnaire. Information retrieved from the questionnaire that has the ability to identify participants will not be reproduced in any format.

**Who will have access to my information?**

This study complies with the Privacy Act 1988 and any information retrieved from the study that is personal and/or identifiable will remain confidential and will not be disclosed to third parties or reported. The questionnaire does not ask for any identifiable information.

The research team will have access to the information collected from the study. In the event of an audit or investigation, staff from the Curtin University Office or Research and Development will also have access to information collected from the study.

All electronic data will be stored on password-protected servers and hard, as per the data management plan. Data will be stored for seven years post-study. The data retrieved from this questionnaire will be used as part of a PhD thesis and for publication. De-identified quotes from the questionnaire may be reported in publications and/or this thesis to illustrate themes identified.

### **Will you tell me the results of the study?**

At the completion of the study, the results of the study will be available online in a publication.

### **Do I have to take part in the study?**

Participation in this study is completely voluntary. Consent is implied for participation and for the use of information when the questionnaire is completed and submitted. This questionnaire is completely anonymous and will not require participants to disclose personal or identifiable information. Withdrawal of data after submission of questionnaire responses is not possible as submitted information is unidentifiable.

### **What happens next and who can I contact about the study?**

Should you require any further information about this study, please contact the research team: Louise Woodhams

([louise.woodhams@postgrad.curtin.edu.au](mailto:louise.woodhams@postgrad.curtin.edu.au)), Leanne Chalmers

([leanne.chalmers@curtin.edu.au](mailto:leanne.chalmers@curtin.edu.au)) or Tin Fei Sim ([t.sim@curtin.edu.au](mailto:t.sim@curtin.edu.au)).

**If you wish to participate in this study, please click on the checkbox below to indicate you have read and understood the information provided in the participant information sheet and consent to be involved. The questionnaire will begin on the next page.**

This study was approved by Curtin University Human Research Ethics Committee (HREC number XXXX). Should you wish to discuss any matters concerning the conduct of the study, your rights as a participant, or you wish to make a confidential complaint, you may contact the Ethics Officer on (08) 266 9223 or email [hrec@curtin.edu.au](mailto:hrec@curtin.edu.au).

I consent to participate in this study.

## **Part I: Current practice of community pharmacists in diabetes management.**

*Part I: Current practice of community pharmacists in diabetes management.*

1. Please answer the following statements below, regarding your practice as a pharmacist in how you currently manage type 2 diabetes (T2DM) and its associated complications in the pharmacy.

Never: I do NOT provide this service to patients

Rarely: I provide this service approximately 25% of the time to patients with T2DM

Sometimes: I provide this service approximately 50% of the time to patients with T2DM

Often: I provide this service approximately 75% of the time to patients with T2DM

Always: I provide this service approximately 100% of the time to patients with T2DM

|                                                                     | Never                 | Rarely                | Sometimes             | Often                 | Always                |
|---------------------------------------------------------------------|-----------------------|-----------------------|-----------------------|-----------------------|-----------------------|
| A. Provide appropriate counselling on new antidiabetic medications. | <input type="radio"/> | <input type="radio"/> | <input type="radio"/> | <input type="radio"/> | <input type="radio"/> |

|                                                                                                                     | Never                 | Rarely                | Sometimes             | Often                 | Always                |
|---------------------------------------------------------------------------------------------------------------------|-----------------------|-----------------------|-----------------------|-----------------------|-----------------------|
| B. Counsel on the appropriate handling, storage and disposal of sharps (e.g. syringes, needles, lancets).           | <input type="radio"/> | <input type="radio"/> | <input type="radio"/> | <input type="radio"/> | <input type="radio"/> |
| C. Counsel on the appropriate administration of injectable therapies.                                               | <input type="radio"/> | <input type="radio"/> | <input type="radio"/> | <input type="radio"/> | <input type="radio"/> |
| D. Review patient's medication history to identify poor adherence.                                                  | <input type="radio"/> | <input type="radio"/> | <input type="radio"/> | <input type="radio"/> | <input type="radio"/> |
| E. Provide information on diet and exercise as it relates to diabetes management.                                   | <input type="radio"/> | <input type="radio"/> | <input type="radio"/> | <input type="radio"/> | <input type="radio"/> |
| F. Provide a weight loss service in the pharmacy for diabetes management, including supply of weight loss products. | <input type="radio"/> | <input type="radio"/> | <input type="radio"/> | <input type="radio"/> | <input type="radio"/> |
| G. Provide a smoking cessation service in the pharmacy for diabetes management.                                     | <input type="radio"/> | <input type="radio"/> | <input type="radio"/> | <input type="radio"/> | <input type="radio"/> |
|                                                                                                                     | Never                 | Rarely                | Sometimes             | Often                 | Always                |



|                                                                                                                              | Never                 | Rarely                | Sometimes             | Often                 | Always                |
|------------------------------------------------------------------------------------------------------------------------------|-----------------------|-----------------------|-----------------------|-----------------------|-----------------------|
| H. Provide blood pressure monitoring services in the pharmacy.                                                               | <input type="radio"/> | <input type="radio"/> | <input type="radio"/> | <input type="radio"/> | <input type="radio"/> |
| I. Provide blood glucose monitoring services in the pharmacy.                                                                | <input type="radio"/> | <input type="radio"/> | <input type="radio"/> | <input type="radio"/> | <input type="radio"/> |
| J. Counsel on self-monitoring of blood glucose.                                                                              | <input type="radio"/> | <input type="radio"/> | <input type="radio"/> | <input type="radio"/> | <input type="radio"/> |
| K. Provide glycosylated haemoglobin (HbA1c) monitoring in the pharmacy.                                                      | <input type="radio"/> | <input type="radio"/> | <input type="radio"/> | <input type="radio"/> | <input type="radio"/> |
| L. Counsel on the risk factors for diabetic nephropathy.                                                                     | <input type="radio"/> | <input type="radio"/> | <input type="radio"/> | <input type="radio"/> | <input type="radio"/> |
| M. Provide education on the importance of regular screening for nephropathy.                                                 | <input type="radio"/> | <input type="radio"/> | <input type="radio"/> | <input type="radio"/> | <input type="radio"/> |
| N. Provide education on testing for diabetic nephropathy, such as the type of test, testing frequency and testing locations. | <input type="radio"/> | <input type="radio"/> | <input type="radio"/> | <input type="radio"/> | <input type="radio"/> |

|                                                                                                                     | Never                 | Rarely                | Sometimes             | Often                 | Always                |
|---------------------------------------------------------------------------------------------------------------------|-----------------------|-----------------------|-----------------------|-----------------------|-----------------------|
|                                                                                                                     | Never                 | Rarely                | Sometimes             | Often                 | Always                |
| O. Counsel on the symptoms of diabetic neuropathy (e.g. neuropathic pain, paresthesia, numbness, formication, etc). | <input type="radio"/> | <input type="radio"/> | <input type="radio"/> | <input type="radio"/> | <input type="radio"/> |
| P. Provide education on the importance of regular screening for diabetic neuropathy.                                | <input type="radio"/> | <input type="radio"/> | <input type="radio"/> | <input type="radio"/> | <input type="radio"/> |
| Q. Counsel on foot checks and good foot care techniques.                                                            | <input type="radio"/> | <input type="radio"/> | <input type="radio"/> | <input type="radio"/> | <input type="radio"/> |
| R. Provide a diabetes foot care service in the pharmacy.                                                            | <input type="radio"/> | <input type="radio"/> | <input type="radio"/> | <input type="radio"/> | <input type="radio"/> |
| S. Facilitate referrals to a podiatrist for foot care management in diabetes.                                       | <input type="radio"/> | <input type="radio"/> | <input type="radio"/> | <input type="radio"/> | <input type="radio"/> |
| T. Provide education on the importance of regular eye examinations.                                                 | <input type="radio"/> | <input type="radio"/> | <input type="radio"/> | <input type="radio"/> | <input type="radio"/> |

|                                                                                             | Never                 | Rarely                | Sometimes             | Often                 | Always                |
|---------------------------------------------------------------------------------------------|-----------------------|-----------------------|-----------------------|-----------------------|-----------------------|
| U. Facilitate referrals to an optometrist and/or ophthalmologist.                           | <input type="radio"/> | <input type="radio"/> | <input type="radio"/> | <input type="radio"/> | <input type="radio"/> |
|                                                                                             | Never                 | Rarely                | Sometimes             | Often                 | Always                |
| V. Facilitate referrals to a dietician for diabetes management.                             | <input type="radio"/> | <input type="radio"/> | <input type="radio"/> | <input type="radio"/> | <input type="radio"/> |
| W. Facilitate referrals to an exercise physiologist for diabetes management.                | <input type="radio"/> | <input type="radio"/> | <input type="radio"/> | <input type="radio"/> | <input type="radio"/> |
| X. Provide monitoring and referral service for microvascular complications in the pharmacy. | <input type="radio"/> | <input type="radio"/> | <input type="radio"/> | <input type="radio"/> | <input type="radio"/> |
| Y. Provide AUSDRISK diabetes risk assessment.                                               | <input type="radio"/> | <input type="radio"/> | <input type="radio"/> | <input type="radio"/> | <input type="radio"/> |

***Part I: Current practice of community pharmacists in diabetes management.***

2. Do you provide any other services to your patients with T2DM that we have not covered? If so, please list them here.

## Part II: Attitudes on microvascular complication management services.

*Part II: Attitudes on microvascular complication management services.*

3. For each of the statements below, click on the response that best characterises your opinion about the statement.

|                                                                                                                                                                   | Strongly disagree     | Disagree              | Unsure                | Agree                 | Strongly agree        |
|-------------------------------------------------------------------------------------------------------------------------------------------------------------------|-----------------------|-----------------------|-----------------------|-----------------------|-----------------------|
| A. People with type 2 diabetes currently have adequate access to health services to manage microvascular complications (nephropathy, retinopathy and neuropathy). | <input type="radio"/> | <input type="radio"/> | <input type="radio"/> | <input type="radio"/> | <input type="radio"/> |

|                                                                                                                                                   | Strongly disagree     | Disagree              | Unsure                | Agree                 | Strongly agree        |
|---------------------------------------------------------------------------------------------------------------------------------------------------|-----------------------|-----------------------|-----------------------|-----------------------|-----------------------|
| B. Community pharmacy has the potential to improve the health outcomes of people living with diabetes and microvascular complications.            | <input type="radio"/> | <input type="radio"/> | <input type="radio"/> | <input type="radio"/> | <input type="radio"/> |
| C. Monitoring microvascular complications and facilitating referrals to appropriate healthcare professionals is achievable in community pharmacy. | <input type="radio"/> | <input type="radio"/> | <input type="radio"/> | <input type="radio"/> | <input type="radio"/> |
| D. A formal monitoring and referral service for microvascular complications is within the scope of the pharmacist.                                | <input type="radio"/> | <input type="radio"/> | <input type="radio"/> | <input type="radio"/> | <input type="radio"/> |
| E. There is a need for a formal monitoring and referral service for microvascular complications in the community pharmacy.                        | <input type="radio"/> | <input type="radio"/> | <input type="radio"/> | <input type="radio"/> | <input type="radio"/> |
|                                                                                                                                                   | Strongly disagree     | Disagree              | Unsure                | Agree                 | Strongly agree        |

|                                                                                                                                                                                         | Strongly disagree     | Disagree              | Unsure                | Agree                 | Strongly agree        |
|-----------------------------------------------------------------------------------------------------------------------------------------------------------------------------------------|-----------------------|-----------------------|-----------------------|-----------------------|-----------------------|
| F. A structured monitoring and referral service in pharmacies can only be implemented if there is remuneration.                                                                         | <input type="radio"/> | <input type="radio"/> | <input type="radio"/> | <input type="radio"/> | <input type="radio"/> |
| G. If a structured monitoring and referral service was available for pharmacists and pharmacies, I would implement this service in the community pharmacy if there was NO remuneration. | <input type="radio"/> | <input type="radio"/> | <input type="radio"/> | <input type="radio"/> | <input type="radio"/> |
| H. I would provide education on diabetic foot care if I was appropriately trained to do so.                                                                                             | <input type="radio"/> | <input type="radio"/> | <input type="radio"/> | <input type="radio"/> | <input type="radio"/> |
| I. I would facilitate referrals to a podiatrist for diabetic foot care if I was provided with appropriate resources.                                                                    | <input type="radio"/> | <input type="radio"/> | <input type="radio"/> | <input type="radio"/> | <input type="radio"/> |
| J. I would provide education on eye care for people living with T2DM, if I was appropriately trained to do so.                                                                          | <input type="radio"/> | <input type="radio"/> | <input type="radio"/> | <input type="radio"/> | <input type="radio"/> |
|                                                                                                                                                                                         | Strongly disagree     | Disagree              | Unsure                | Agree                 | Strongly agree        |

|                                                                                                                                                                        | Strongly disagree     | Disagree              | Unsure                | Agree                 | Strongly agree        |
|------------------------------------------------------------------------------------------------------------------------------------------------------------------------|-----------------------|-----------------------|-----------------------|-----------------------|-----------------------|
| K. I would refer patients to an ophthalmologist/ optometrist for people living with T2DM, if provided with appropriate resources.                                      | <input type="radio"/> | <input type="radio"/> | <input type="radio"/> | <input type="radio"/> | <input type="radio"/> |
| L. Health professionals such as podiatrists and optometrists would appreciate a referral system from pharmacists.                                                      | <input type="radio"/> | <input type="radio"/> | <input type="radio"/> | <input type="radio"/> | <input type="radio"/> |
| M. An in-pharmacy microvascular monitoring and referral service would need to be advertised to the relevant health professionals such as podiatrists and optometrists. | <input type="radio"/> | <input type="radio"/> | <input type="radio"/> | <input type="radio"/> | <input type="radio"/> |
| N. An in-pharmacy microvascular monitoring and referral service should be set up with local podiatrists and optometrists.                                              | <input type="radio"/> | <input type="radio"/> | <input type="radio"/> | <input type="radio"/> | <input type="radio"/> |
| O. An in-pharmacy microvascular monitoring and referral service would need to be advertised to the public.                                                             | <input type="radio"/> | <input type="radio"/> | <input type="radio"/> | <input type="radio"/> | <input type="radio"/> |

*Part II: Attitudes on microvascular complication management services.*

4. Please indicate to what extent you believe the following to be barriers to implementing a new microvascular complication service.

|                                                                                             | Strongly disagree     | Disagree              | Unsure                | Agree                 | Strongly agree        |
|---------------------------------------------------------------------------------------------|-----------------------|-----------------------|-----------------------|-----------------------|-----------------------|
| A. Lack of remuneration                                                                     | <input type="radio"/> | <input type="radio"/> | <input type="radio"/> | <input type="radio"/> | <input type="radio"/> |
| B. Lack of consumer awareness of the role of pharmacists in diabetes management.            | <input type="radio"/> | <input type="radio"/> | <input type="radio"/> | <input type="radio"/> | <input type="radio"/> |
| C. Lack of health professional awareness of the role of pharmacists in diabetes management. | <input type="radio"/> | <input type="radio"/> | <input type="radio"/> | <input type="radio"/> | <input type="radio"/> |
| D. Pharmacists do not have adequate knowledge on microvascular complications.               | <input type="radio"/> | <input type="radio"/> | <input type="radio"/> | <input type="radio"/> | <input type="radio"/> |
|                                                                                             | Strongly disagree     | Disagree              | Unsure                | Agree                 | Strongly agree        |



|                                                                                                                                      | Strongly disagree     | Disagree              | Unsure                | Agree                 | Strongly agree        |
|--------------------------------------------------------------------------------------------------------------------------------------|-----------------------|-----------------------|-----------------------|-----------------------|-----------------------|
| E. Lack of resources to implement the service (information for pharmacists, pharmacy software, information to give to patients, etc) | <input type="radio"/> | <input type="radio"/> | <input type="radio"/> | <input type="radio"/> | <input type="radio"/> |
| F. Inadequate pharmacy layout and workflow to facilitate service provision.                                                          | <input type="radio"/> | <input type="radio"/> | <input type="radio"/> | <input type="radio"/> | <input type="radio"/> |
| G. Competing demands and lack of pharmacist availability.                                                                            | <input type="radio"/> | <input type="radio"/> | <input type="radio"/> | <input type="radio"/> | <input type="radio"/> |
| H. Negative perception among other health professionals towards pharmacists providing the service.                                   | <input type="radio"/> | <input type="radio"/> | <input type="radio"/> | <input type="radio"/> | <input type="radio"/> |

***Part II: Attitudes on microvascular complication management services.***

5. Please list any other barriers you believe will influence implementing this service.

**Part III: Knowledge, continuing professional development and training.**

*Part III: Knowledge, continuing professional development and training.*

6. For each of the statements below, click on the response that best characterises your opinion about the statement.

|                                                                                              | Strongly disagree     | Disagree              | Unsure                | Agree                 | Strongly agree        |
|----------------------------------------------------------------------------------------------|-----------------------|-----------------------|-----------------------|-----------------------|-----------------------|
| A. People living with type 2 diabetes are required to have foot examinations every 6 months. | <input type="radio"/> | <input type="radio"/> | <input type="radio"/> | <input type="radio"/> | <input type="radio"/> |
| B. People living with type 2 diabetes are required to have eye examinations every 2 years.   | <input type="radio"/> | <input type="radio"/> | <input type="radio"/> | <input type="radio"/> | <input type="radio"/> |

|                                                                                                                                                               | Strongly disagree     | Disagree              | Unsure                | Agree                 | Strongly agree        |
|---------------------------------------------------------------------------------------------------------------------------------------------------------------|-----------------------|-----------------------|-----------------------|-----------------------|-----------------------|
| C. 1 in 10 people living with type 2 diabetes will develop diabetic kidney disease at some point in their life.                                               | <input type="radio"/> | <input type="radio"/> | <input type="radio"/> | <input type="radio"/> | <input type="radio"/> |
| D. Microvascular complications develop from poorly controlled blood glucose and blood pressure.                                                               | <input type="radio"/> | <input type="radio"/> | <input type="radio"/> | <input type="radio"/> | <input type="radio"/> |
| E. Diabetic neuropathy mostly causes nerve damage in the legs and feet.                                                                                       | <input type="radio"/> | <input type="radio"/> | <input type="radio"/> | <input type="radio"/> | <input type="radio"/> |
| F. Pharmacists would require additional training to perform foot examinations on patients.                                                                    | <input type="radio"/> | <input type="radio"/> | <input type="radio"/> | <input type="radio"/> | <input type="radio"/> |
| G. Pharmacists would require additional training to assess diabetic neuropathy in patients.                                                                   | <input type="radio"/> | <input type="radio"/> | <input type="radio"/> | <input type="radio"/> | <input type="radio"/> |
| H. Pharmacists would require additional training to understand the importance of microvascular complication management in people living with type 2 diabetes. | <input type="radio"/> | <input type="radio"/> | <input type="radio"/> | <input type="radio"/> | <input type="radio"/> |

|                                                                                             |                       |                       |                       |                       |                       |
|---------------------------------------------------------------------------------------------|-----------------------|-----------------------|-----------------------|-----------------------|-----------------------|
|                                                                                             | Strongly disagree     | Disagree              | Unsure                | Agree                 | Strongly agree        |
| I. Pharmacists would require additional tools and resources to facilitate formal referrals. | <input type="radio"/> | <input type="radio"/> | <input type="radio"/> | <input type="radio"/> | <input type="radio"/> |

*Part III: Knowledge, continuing professional development and training.*

7. Please compare the different training modes and select which training method you would prefer.

|                                  | <b>Method A</b>                             | <b>Method B</b>                              | <b>Method C</b>                            | <b>Method D</b> |
|----------------------------------|---------------------------------------------|----------------------------------------------|--------------------------------------------|-----------------|
| Format                           | Completely online                           | Workshop only                                | Online module and workshop                 | No training     |
| Examinations and referral points | Video of foot examinations by a podiatrist. | In-person demonstration of foot examinations | Video and in-person demonstrations of foot |                 |

|                     |                                                   |                                                                                 |                                                                    |  |
|---------------------|---------------------------------------------------|---------------------------------------------------------------------------------|--------------------------------------------------------------------|--|
|                     | Video of eye referral points by optometrist.      | by a podiatrist. In-person demonstration of eye referral points by optometrist. | examinations by podiatrist and eye referral points by optometrist. |  |
| Tools and resources | Monitoring and referral tool resources available. | Monitoring and referral tool resources available.                               | Monitoring and referral tool resources available.                  |  |

Method A

Method B

Method C

Method D

8. Please add any additional comments here, regarding preferred method of training.

**Part IV: Potential service delivery models.**

***Part IV: Potential service delivery models.***

9. Question 9 relates to software requirements for a screening, monitoring and referral system for microvascular complication T2DM management service. Please choose from the following options the software design that you believe most suitable.

Service runs on a separate platform/ software.

Service is incorporated into current dispensing software.

No software is required for this service

**Part IV: Potential service delivery models.**

10a. Please indicate on the scale below how comfortable you would feel providing the service listed below (after comprehensive training, where necessary).

Service 1: Providing education on foot care techniques.

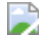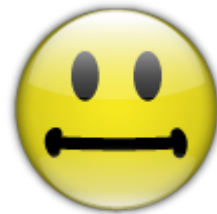

**Part IV: Potential service delivery models.**

10b. Please indicate on the scales below how comfortable you would feel providing the service listed below (after comprehensive training, where necessary).

Service 2: Demonstrating to patients how to examine their feet.

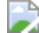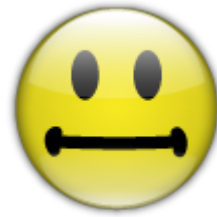

**Part IV: Potential service delivery models.**

10c. Please indicate on the scale below how comfortable you would feel providing the service listed below (after comprehensive training, where necessary).

Service 3: Performing a foot examination.

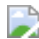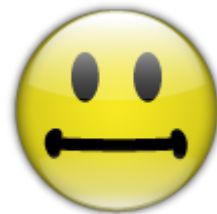



***Part IV: Potential service delivery models.***

11. Out of the two options for a service delivery model outlined below, please rank your preference, with 1 = first choice and 2 = last choice.

Service relies on pharmacist to remember to educate and counsel on regular follow-ups with podiatrist and optometrist.

Service includes automatic reminders for foot, eye and blood tests whilst dispensing prescriptions.

Service is linked to existing services in community pharmacy, such as Diabetes Medschecks and health checks/ screening.

Service is provided on an ad hoc basis, when monitoring needs are identified.

There is no need for a monitoring and referral service.

***Part IV: Potential service delivery models.***

12. Below are examples of referral services. Please rank these services from first choice to last choice.

1 = you would most likely want to do

4 = you would least likely want to do.

Verbal referral from pharmacist.

Hand-written referral by pharmacist.

Referral created by pharmacist from template on separate platform/ software.

Automated referral process whilst dispensing.

***Part IV: Potential service delivery models.***

13. Imagine a screening, monitoring and referral service for microvascular complications exists in your pharmacy. The process and steps for this service are shown below:

Step 1: Automated reminder for annual foot check appears whilst dispensing patient's prescriptions.

Step 2: The pharmacist assesses the need for the service.

Step 3: The pharmacist provides written and verbal counselling on foot care techniques and the reasons why this is important.

Step 4: The pharmacist provides a demonstration on how to perform a foot examination, so that the patient can perform regular checks at home.

Step 5: The pharmacist performs a foot examination for the patient.

Step 6: An automated referral to the local podiatrist is generated, emailed to the practitioner and printed for the patient.

Based on this information, how long (in minutes) do you think this service would take to complete?

*Part IV: Potential service delivery models.*

14. Who do you think should pay for this service described above?

**Part V: Demographics**

***Part V: Demographics***

15. What is your gender?

Male

Female

Other

Prefer not to say

***Part V: Demographics***

16. What is your age?

<30 years old

30-40 years old

41-50 years old

51-60 years old

>60 years

***Part V: Demographics***

17. How long have you been a registered pharmacist in Australia?

<5 years

5-10 years

11-15 years

16-20 years

>20 years

***Part V: Demographics***

18. Which of the following best describes your role in the community pharmacy? If you work in multiple pharmacies, please state your position in your primary workplace.

Sole proprietor

Partner proprietor

Pharmacist in charge

Employee pharmacist

Other (please specify)

*Part V: Demographics*

19. Which of the following best describes the setting of the community pharmacy?

City centre

Shopping strip

Shopping centre

Isolated

Next to medical centre

Other (please specify)

*Part V: Demographics*

20. Which of the following best describes the size of operation of this pharmacy?

Small (turnover <\$2 million per annum)

Large (turnover >\$2 million per annum)

Unsure

***Part V: Demographics***

21. Which state/ territory do you work in?

Australian Capital Territory (ACT)

New South Wales (NSW)

Northern Territory (NT)

Queensland (QLD)

South Australia (SA)

Tasmania (TAS)

Victoria (VIC)

Western Australia (WA)

***Part V: Demographics***

22. Which of the following best describes the location of the community pharmacy?

City

Suburb

Rural

Remote

***Part V: Demographics***

23. Which of the following best describes the location of this pharmacy in relation to the nearest medical practice?

Co-located

<100 metres

101-500 metres

501 metres - 1 kilometre

>1 kilometre

***Part V: Demographics***

24. What is your highest level of pharmacy education?

Bachelor of Pharmacy

Bachelor of Pharmacy (Hons)



Master of Pharmacy

PharmD

PhD

***Part V: Demographics***

25. Are you an accredited pharmacist?

Yes, accredited pharmacist

Yes, undergoing accreditation

No, not an accredited pharmacist or undergoing accreditation

***Part V: Demographics***

26. Are you an accredited diabetes educator?

Yes, accredited diabetes educator

No, but undergoing accreditation

No, not an accredited diabetes educator or undergoing accreditation

This is the end of the survey. Clicking on the arrow below will submit your response.

Powered by Qualtrics
